# Supplementary material for: Associations between food contaminants exposure and pubertal development at 10 and 13 years old
Source: Research Square preprint supplement (doi:10.21203/rs.3.rs-6311918/v1), 2025-04-15
Supplement: Supplementary file 1 [file 63888f1a758beeec208eeea2.docx]

# Supplemental material

Table S1: Sociodemographic characteristics at baseline of the eligible participants and those of the remaining cohort.

|  | Eligible participants  (n = 5279) | Remaining cohort  (n = 3368) | p-value |
| --- | --- | --- | --- |
| Maternal age (years)*, mean (SD)* | 29.8 (5.2) | 27.8 (5.9) | **<0.001** |
| Maternal education (years)*, mean (SD)* | 11.2 (4.3) | 9.3 (4.0) | **<0.001** |
| Maternal smoking habits*, n (%)* |  |  | **<0.001** |
| Smokers | 1774 (33.8) | 1481 (44.3) |  |
| Non-smokers | 3475 (66.2) | 1864 (55.7) |  |
| Child sex*, n (%)* |  |  | 0.53 |
| Female | 2572 (48.7) | 1665 (49.4) |  |
| Male | 2707 (51.3) | 1703 (50.6) |  |
| Childbirth weight (g), *mean (SD)* | 3146.3 (533.41) | 3152.3 (545.69) | 0.61 |
| Childbirth length (cm), *mean (SD)* | 48.61 (2.54) | 48.6 (2.57) | 0.89 |

Abbreviations: n – sample size, % – percentage, SD – standard deviation.

Note: p-values from chi-square test or Student's t test, as appropriate.

Significant values are in **bold**.

Table S2: Reliability analysis of Tanner scale parameters.

|  | **α** | **med.r** | **r.drop** | **% miss** |
| --- | --- | --- | --- | --- |
| **Girls** |  |  |  |  |
| Pubic hair, 10 years | 0.72 | 0.38 | 0.48 | 40 |
| Breast rating, 10 years | 0.70 | 0.39 | 0.53 | 39 |
| Axillary hair, 13 years | 0.69 | 0.31 | 0.57 | 87 |
| Pubic hair, 13 years | 0.70 | 0.36 | 0.56 | 55 |
| Breast rating, 13 years | 0.73 | 0.36 | 0.46 | 47 |
| **Boys** |  |  |  |  |
| Pubic hair, 10 years | 0.72 | 0.37 | 0.30 | 40 |
| Genital rating, 10 years | 0.69 | 0.33 | 0.43 | 45 |
| Axillary hair, 13 years | 0.58 | 0.30 | 0.63 | 50 |
| Pubic hair, 13 years | 0.59 | 0.33 | 0.62 | 49 |
| Genital rating, 13 years | 0.67 | 0.31 | 0.45 | 47 |

**Abbreviations and notes**

- α – raw alpha. Indicates the internal consistency to test if the items collectively measure a coherent construct.
- med.r – median of inter-item correlations. Represents the median of the correlation coefficients between a specific item and all the remaining items in the scale.
- r.drop – item-scale correlation after dropping the item. Measures the unique contribution of a specific item to the overall reliability of the scale
- % miss – miss rates, measured through percentage of missing reports.

Table S3: Graded response model item parameter estimates.

|  | **a** | **b1** | **b2** | **b3** | **b4** |
| --- | --- | --- | --- | --- | --- |
| **Girls** |  |  |  |  |  |
| Pubic hair, 10 years | 2.374 | -0.166 | 0.848 | 2.191 | 3.689 |
| Breast rating, 10 years | 3.273 | -0.715 | 0.595 | 1.903 | 3.374 |
| Pubic hair, 13 years | 1.039 | -5.380 | -3.144 | -0.630 | 2.436 |
| Breast rating, 13 years | 0.961 | -4.999 | -2.510 | -0.151 | 2.845 |
| **Boys** |  |  |  |  |  |
| Pubic hair, 10 years | 1.208 | 1.807 | 3.540 | 5.218 | 7.612 |
| Genital rating, 10 years | 2.360 | 0.769 | 2.511 | 3.435 | 4.604 |
| Pubic hair, 13 years | 1.246 | -1.885 | -0.478 | 0.815 | 2.785 |
| Genital rating, 13 years | 1.745 | -3.316 | -1.499 | -0.397 | 0.892 |

**Abbreviations and notes**

- a – item’s discrimination (item slope).
- b – Item threshold (item difculty).

Figure S1: Item operation characteristic curves.

|  | **Girls** | **Boys** |
| --- | --- | --- |
| Pubic hair, 10 years | 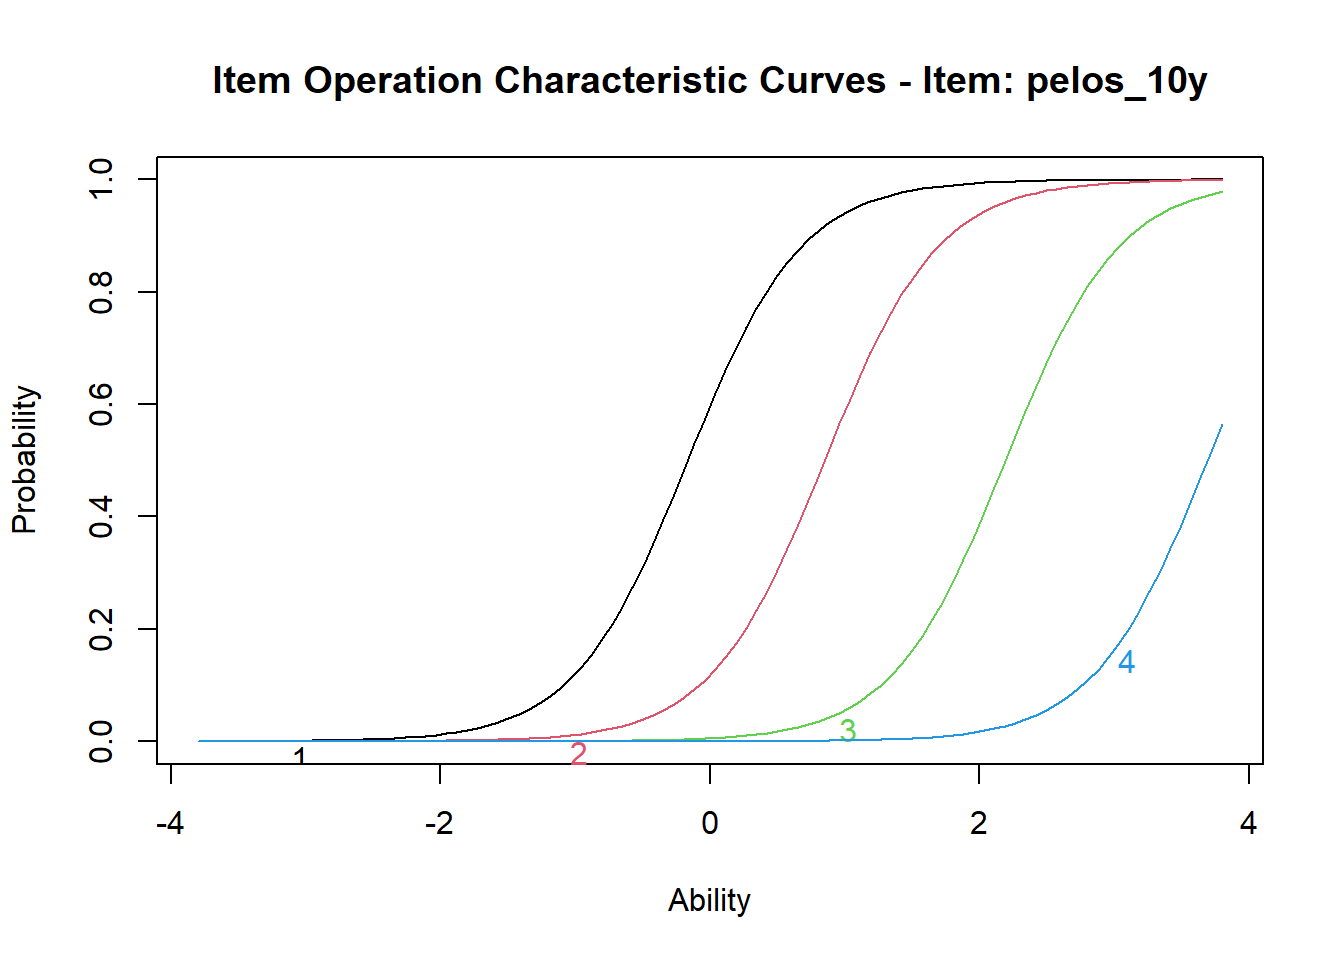 | 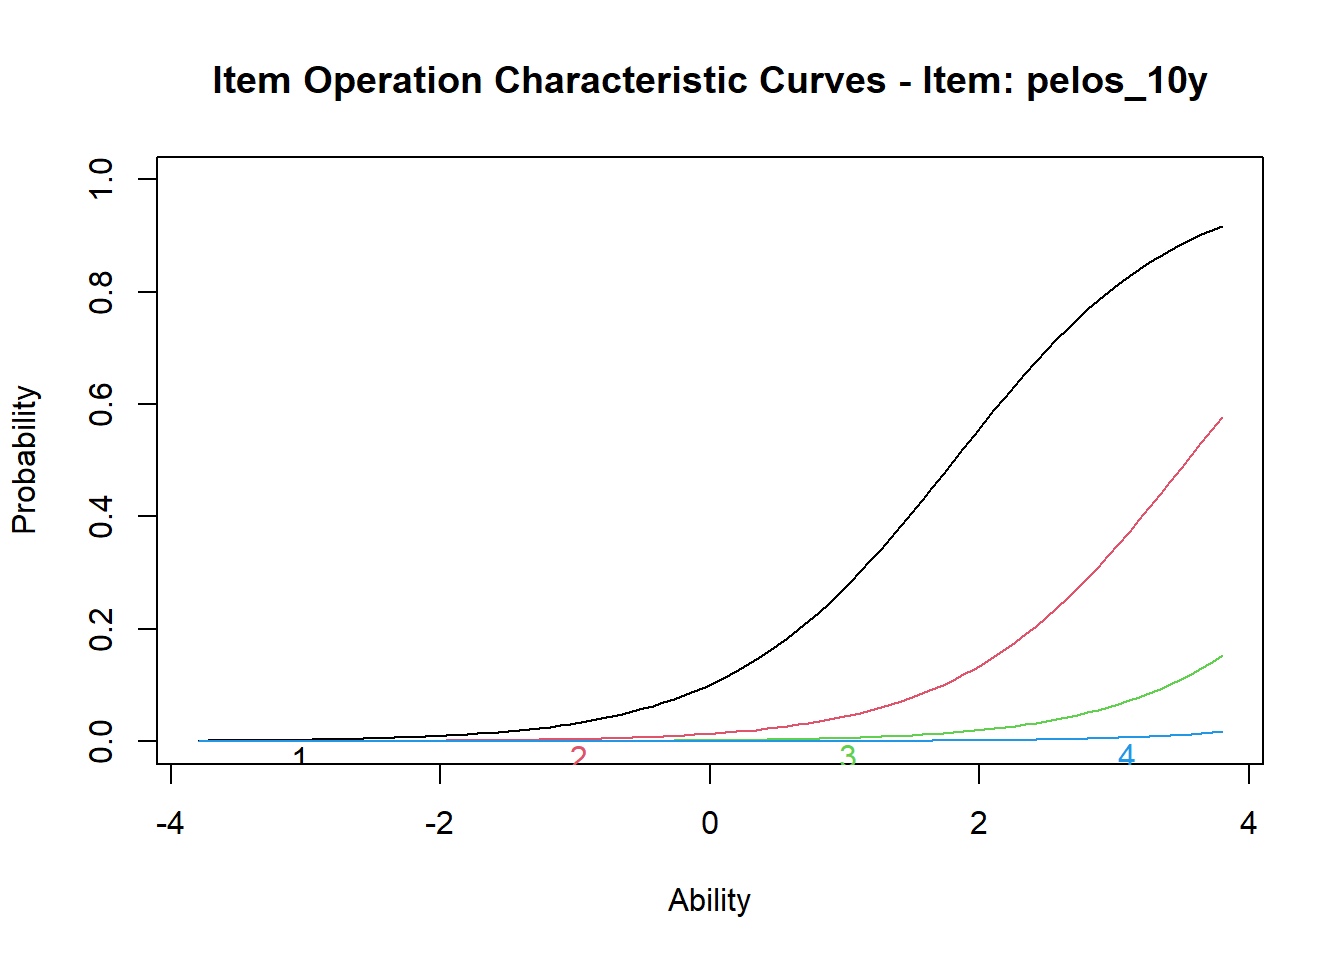 |
| Breast or genital ratinga, 10 years | 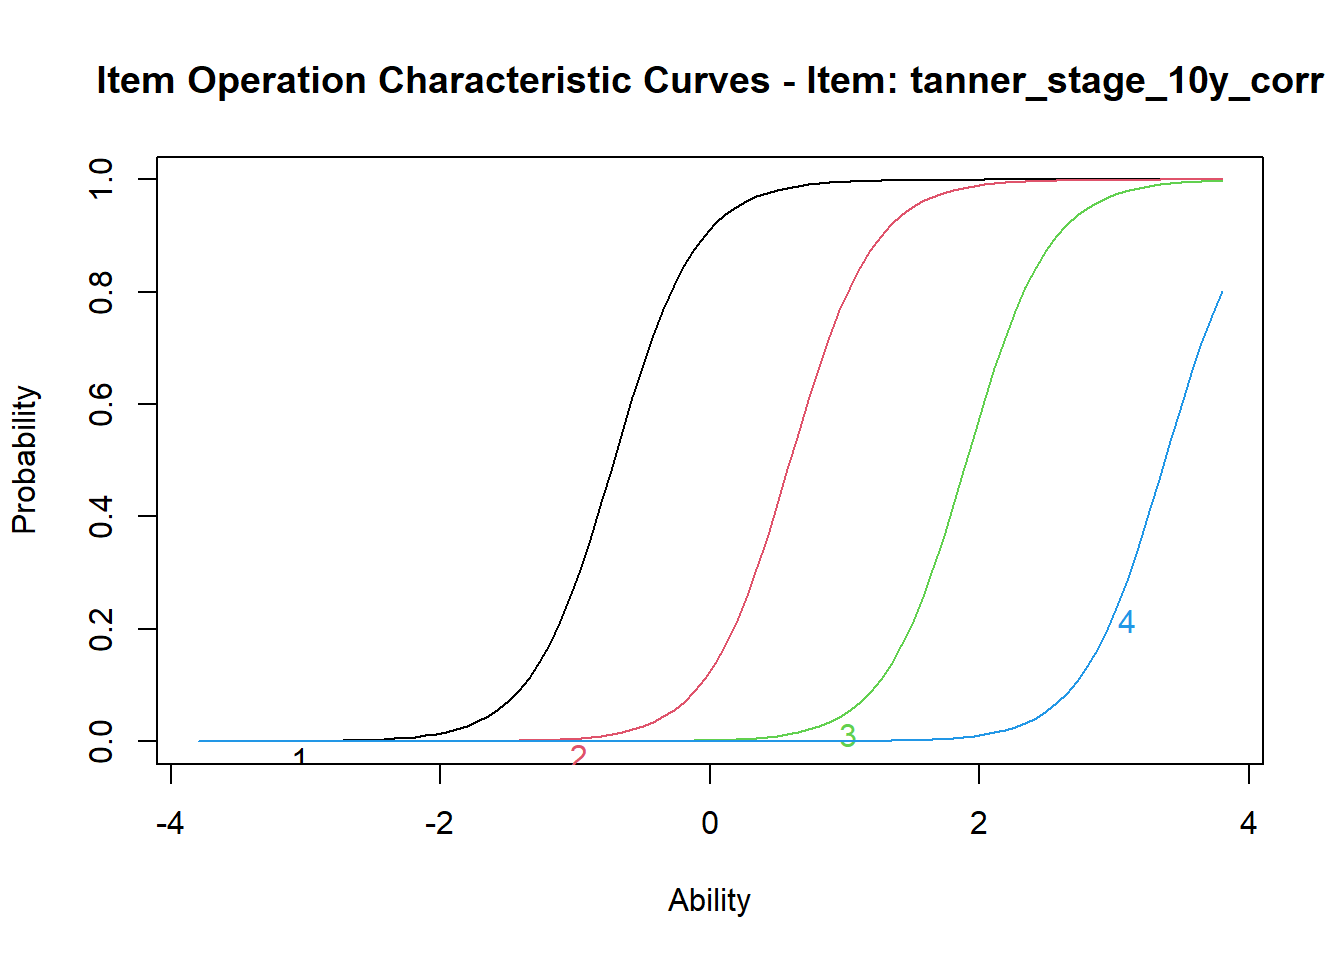 | 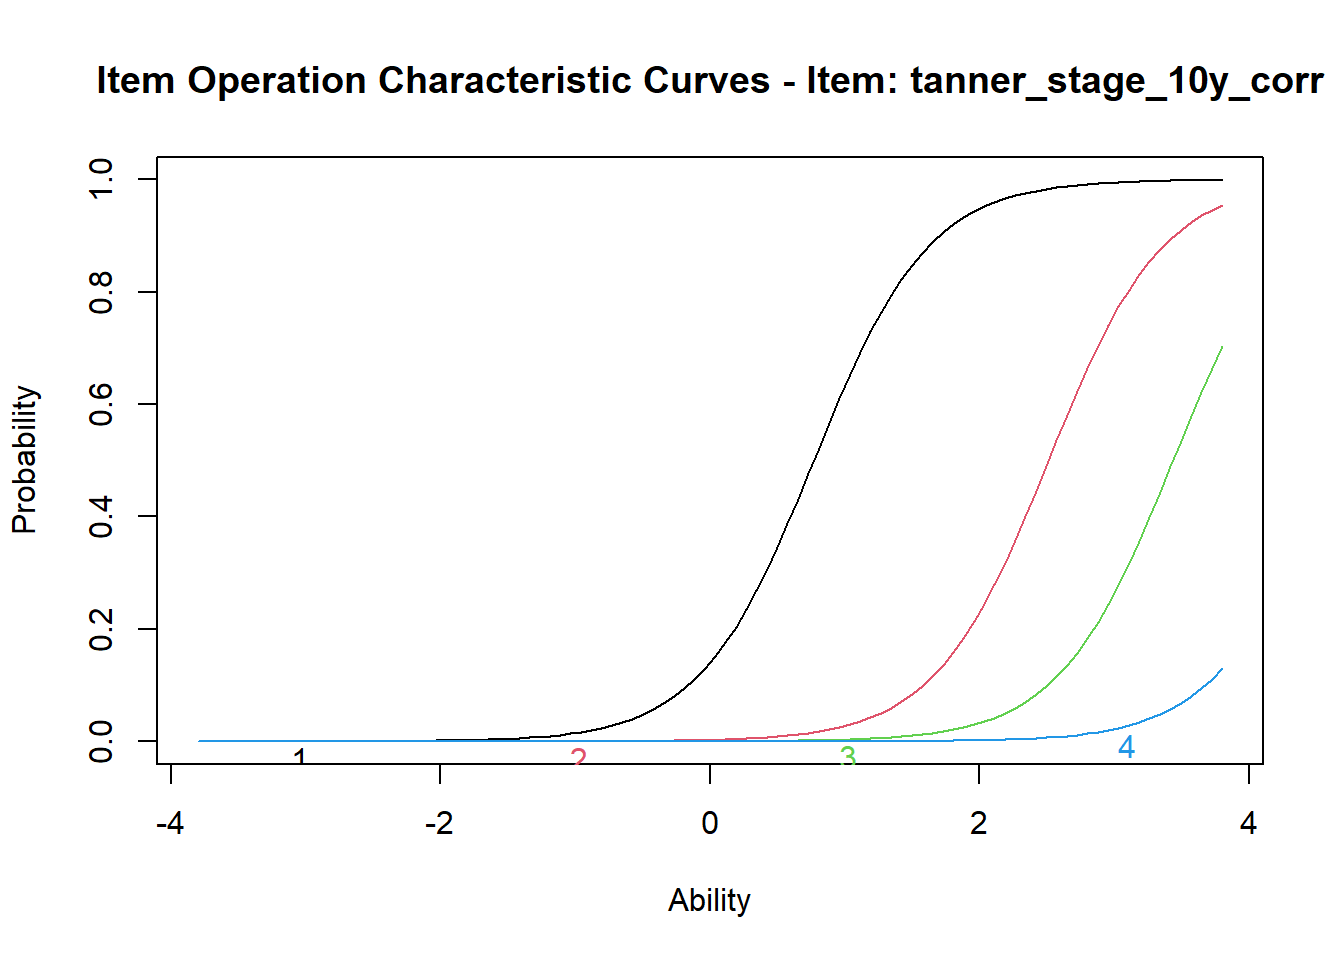 |
| Pubic hair, 13 years | 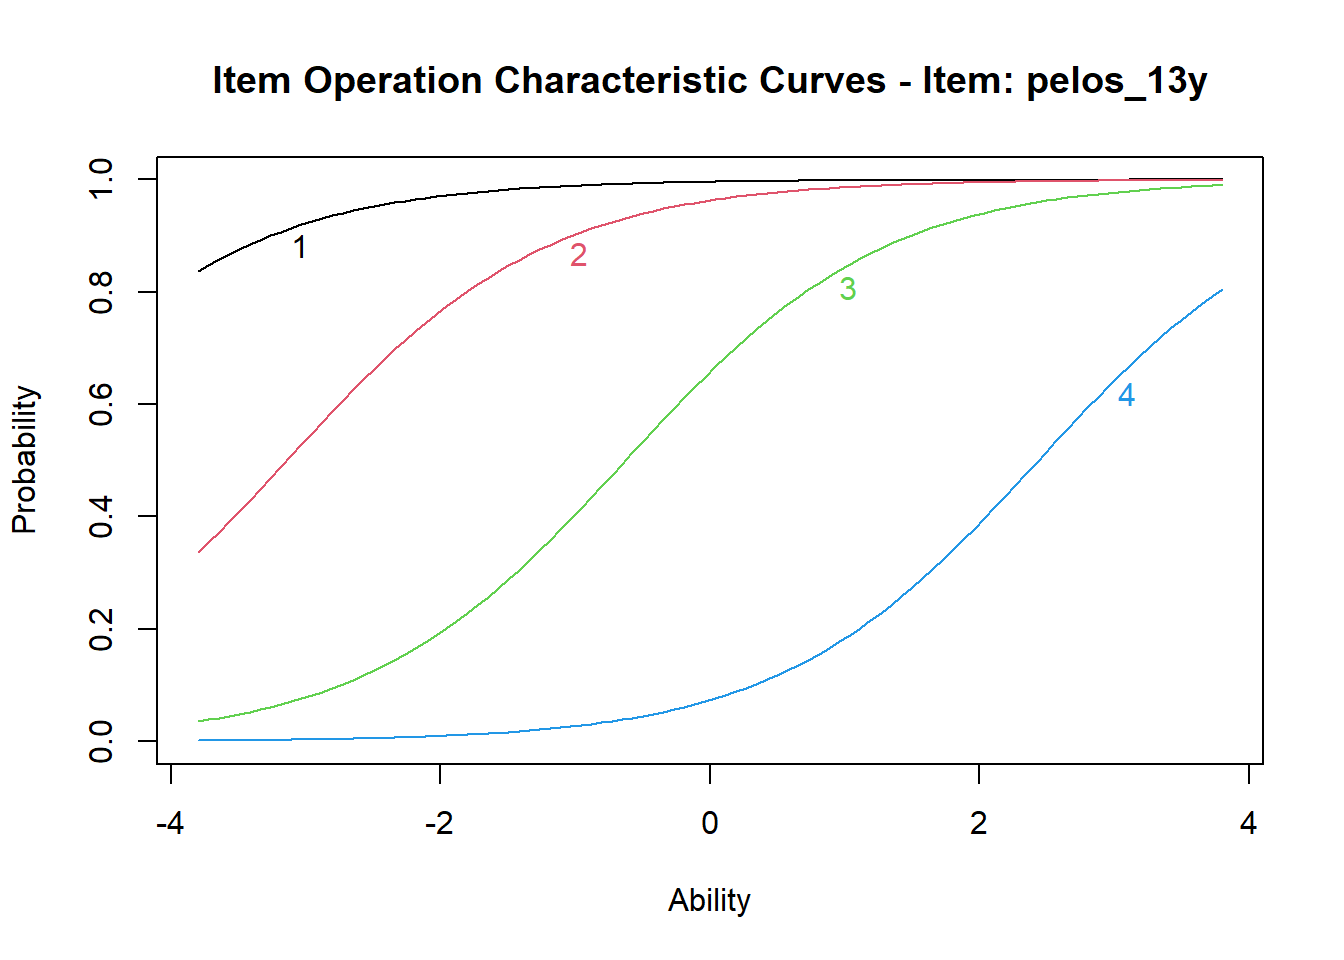 | 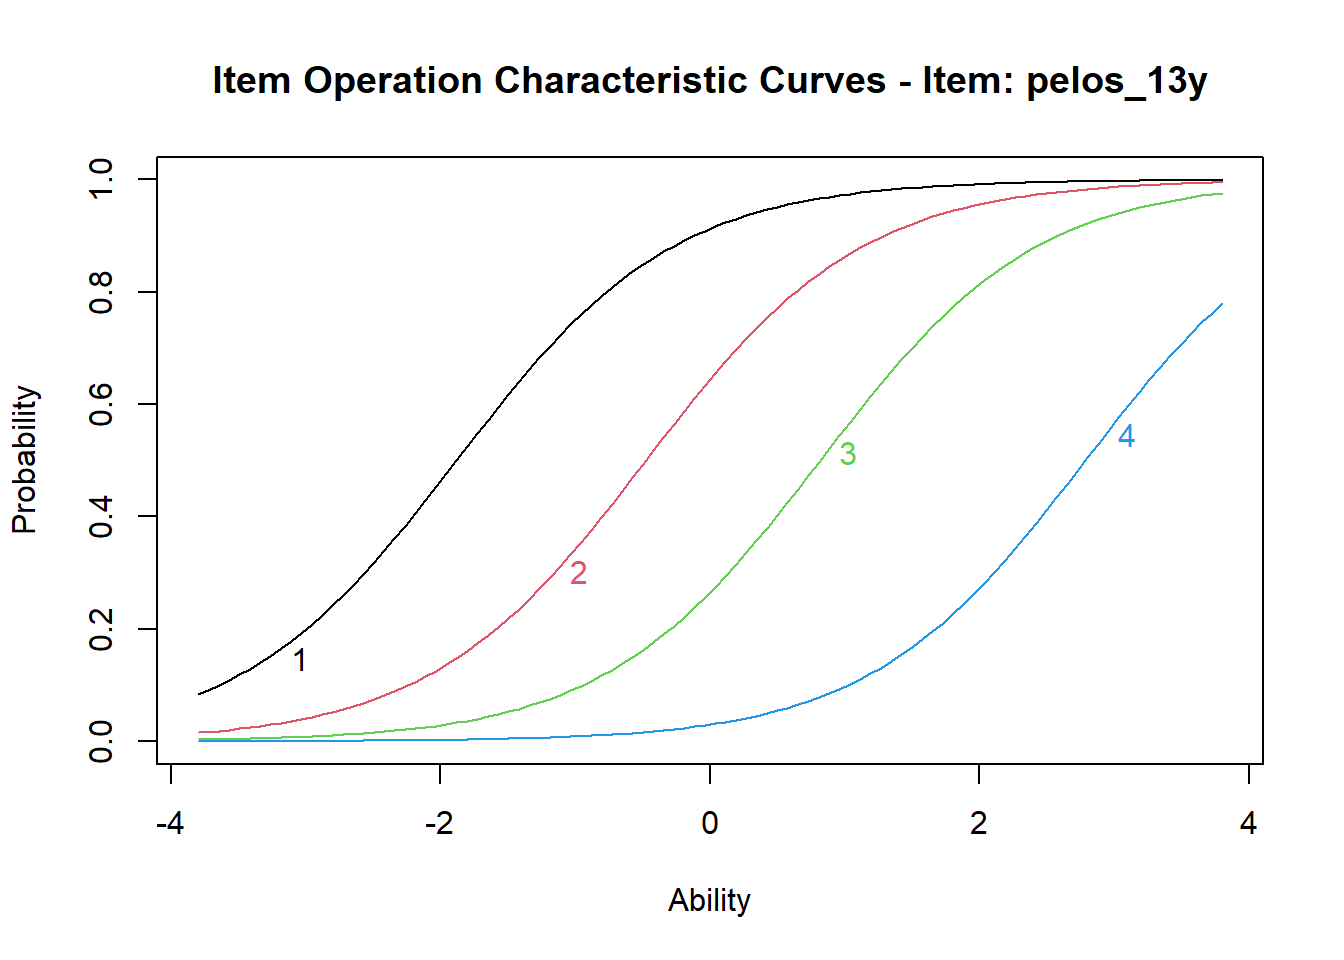 |
| Breast or genital ratinga, 13 years | 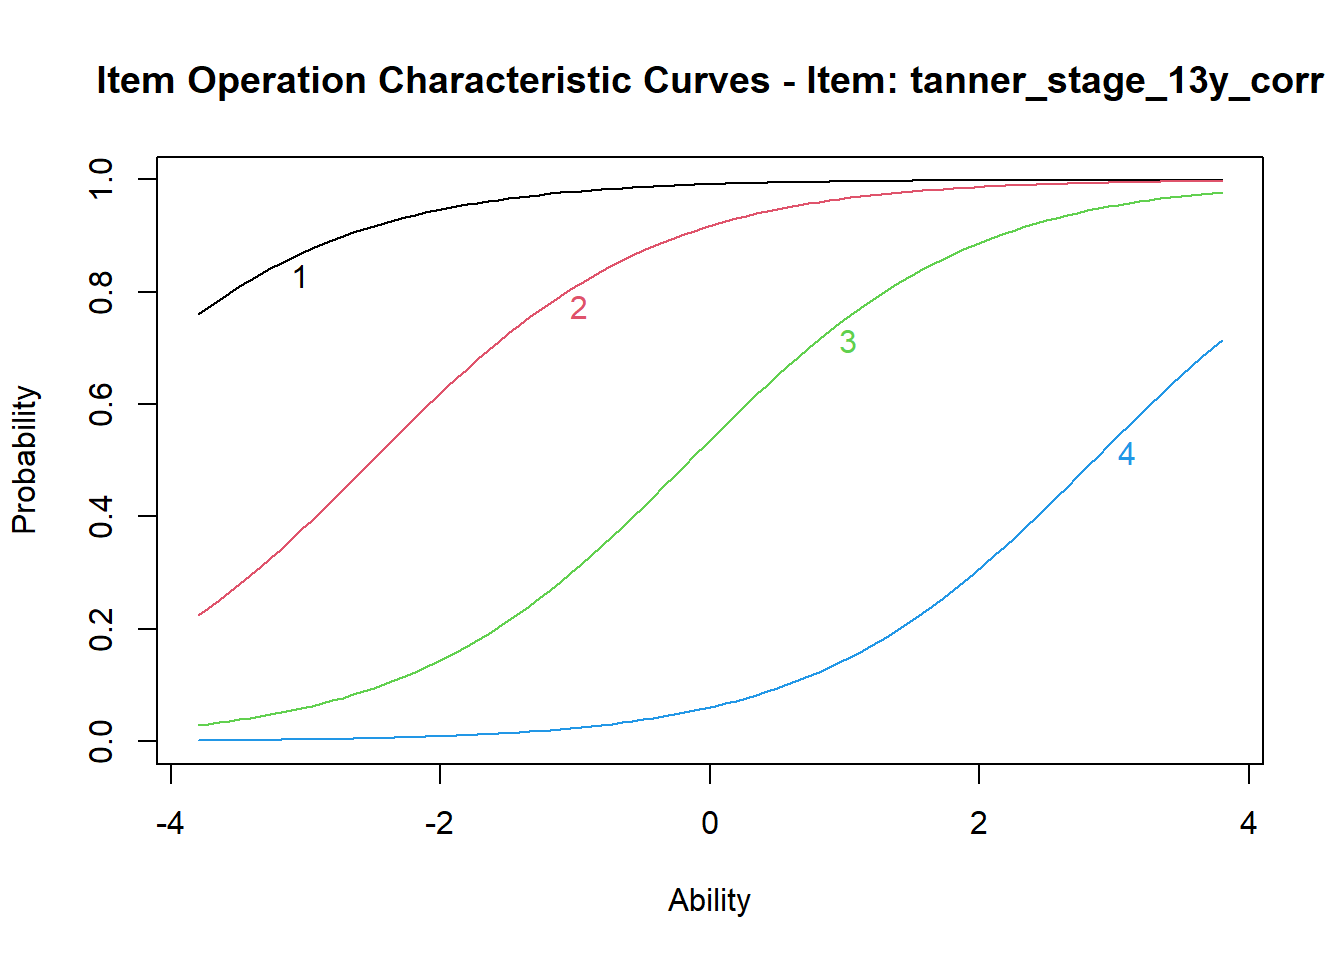 | 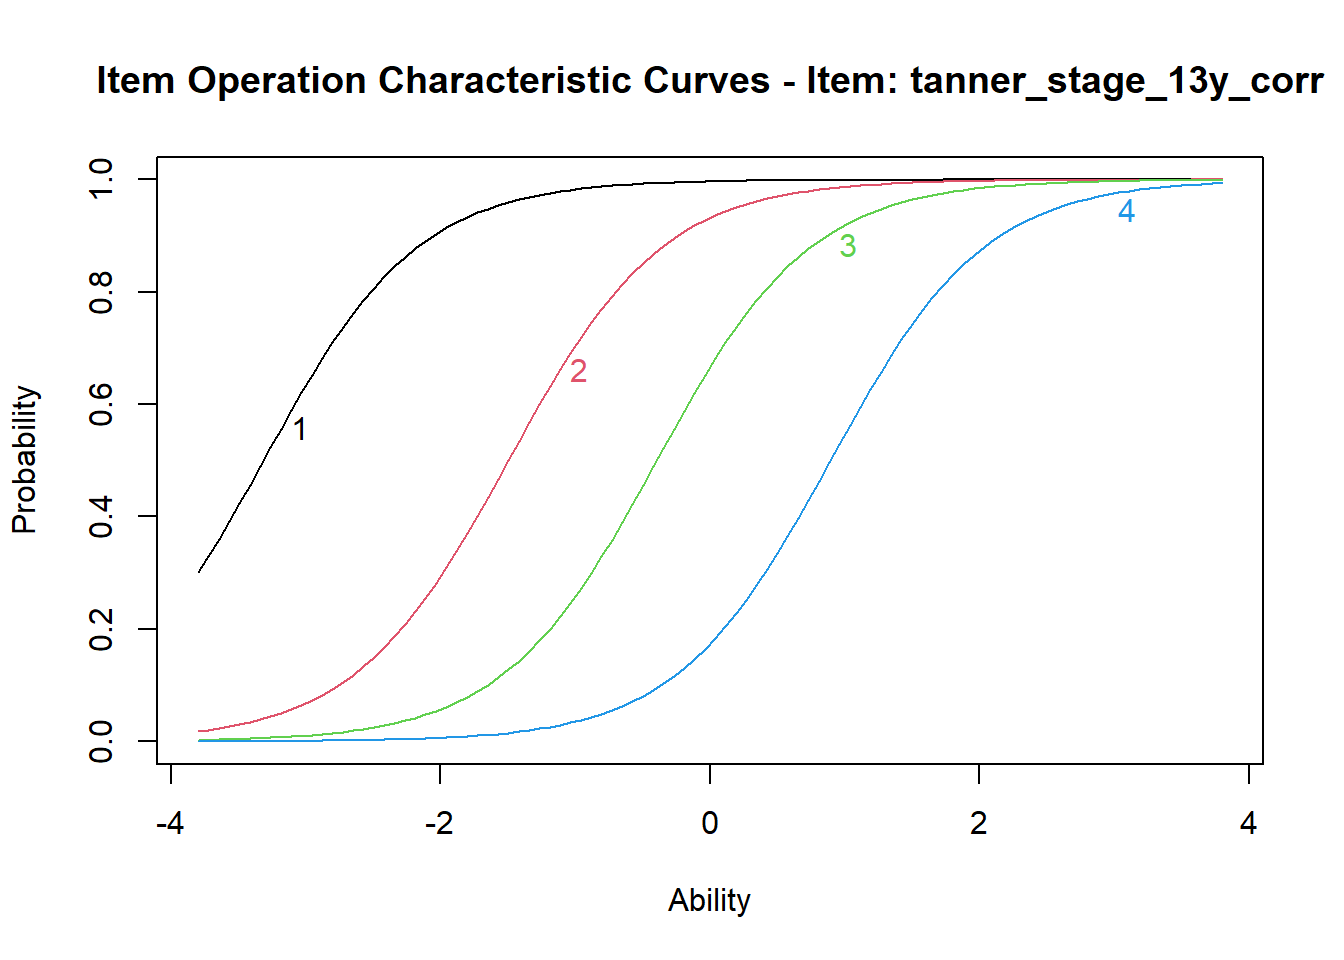 |

Notes: a) Breast rating for girls or genital rating for boys.
